# Supplementary material for: Neutral Red as a Probe for Confocal Laser Scanning Microscopy Studies of Plant Roots
Source: Oxford University Press journal article supplement (doi:10.1093/aob/mcl045), 2006-03-06
Supplement: mcl045Supple._Info_figure_legends_edited.doc [file mcl045Supple._Info_figure_legends_edited.doc]

**Supplementary Information:**

Fig. SF1. Autofluorescence test for tissues of the unstained *Arabidopsis* root. Roots were mounted in 0.2 MS medium and observed under CLSM using 488 nm and 543 nm excitation for GFP (green) and NR (red) channels, respectively. (A–D) *PIN1:GFP* line: (A) green channel; (B) red channel; (C) phase-contrast image; (D) merged image of phase-contrast image and green channel. (E and F) Col-0 wild-type plant: (E) bright-field Nomarski differential-interference-contrast image; (F) red channel. Note absence of any signal in the red channel. Scale bars = 50 µm.

Fig. SF2. Effect of oryzalin on the cortical microtubule network in a *GFP-MAP4* line. Roots were incubated in 1 µm oryzalin prepared in 0.2 MS medium and incubated for 0 (A), 2 (B) and 4 (C) hours. Cortical cells of the young differentiated zone in these roots were visualized using the green channel. Note changed orientation of microtubules 2 h after the start of the treatment and their complete disorganization at 4 h of treatment. Tangential single optical sections in (A) and (B). (C) Projection of eight optical sections, total thickness of tissues scanned is 7 µm. Scale bar = 50 µm.

Fig. SF3. NR staining kinetics at pH 8.0 (0.2 MS in 20 mm K-phosphate buffer) in arabidopsis Col-0 wild-type plants. Staining time of protoxylem with 0.4 µm NR in the young differentiation zone of two different roots was 15 min (A) and 3.5 h (B). Single optical sections. Scale bar = 20 µm.

Fig. SF4. Intact arabidopsis root (Col-0), 10 dag, stained with 10 µg mL–1 of propidium iodide for 30 min. The differentiation zone is shown. Note that the stain does not penetrate deeper than the endodermis layer. A single optical section. ep, Epidermis; c, cortex; e, endodermis. Scale bar = 20 µm.

Fig. SF5. NR as a probe for visualization of the endodermis Casparian band and xylem elements in living roots of wild-type arabidopsis, Col-0 at lowest concentration tested (pH 5.8). Arrowheads indicate Casparian bands. px, Protoxylem; mx, metaxylem. (A) Young and (B) mature differention zone of the same root stained with 0.4 µm NR for 10 min. Single optical sections. Scale bar = 20 µm.

Fig. SF6. Staining of the root apical meristem of the primary (A) and recently emerged lateral root of arabidopsis Ler wild-type plants. 15 min staining in 4 µm NR prepared in 0.1 m K-phosphate buffer, pH 8.0. (A) Note the staining of root cap cells; NR penetrated only epidermis and not other meristematic cells layers. (B) Under the same conditions in recently emerged lateral root apparently NR penetrated slower and stained only the root cap cells. Single optical sections. Scale bar = 20 µm.

Movie:

Movie SM1: Movie_NR.AVI: 3-D reconstruction of *Glomus mosseae* in mycorrhizal roots of *Allium porrum.* For details see Fig. 8 in main text.
