# Supplementary material for: Neutral Red as a Probe for Confocal Laser Scanning Microscopy Studies of Plant Roots
Source: Oxford University Press journal article supplement (doi:10.1093/aob/mcl045), 2006-03-06
Supplement: Movielegend.doc [file Movielegend.doc]

Movie:

Movie SM1: Movie_NR.AVI: 3-D reconstruction of *Glomus mosseae* in mycorrhizal roots of *Allium porrum.* For details see Fig. 8 in main text.
